# Supplementary material
Source: MDPI journal article supplement (https://www.mdpi.com/2076-3417/13/16/9448)
Supplement: s1 [file s1]

Supplementary Table S1: Diet plan for weight loss.

**STANDARD DIET 1500 KCAL  
BODY WEIGHT LOSS  
(LOW CALORIC DIET - LCD)**

| W<br>H<br>I<br>T<br>E<br>M<br>E<br>A<br>T | MEALS            | MENU 1 TIME WEEKLY                                                                                                                                          |
|-------------------------------------------|------------------|-------------------------------------------------------------------------------------------------------------------------------------------------------------|
|                                           | <b>BREAKFAST</b> | Fresh orange juice (1 cup) + rusks or 1 sl. Whole wheat bread (1 oz.)+ 1 oz. low- fat cheese + 1 oz. Turkey, or any other low fat sausage(salted or smoked) |
|                                           | <b>SNACK</b>     | Banana (1 medium, 4oz.)                                                                                                                                     |
|                                           | <b>LUNCH</b>     | Seasonal salad <sup>(2)</sup> or vegetable soup + chicken, without its fat crust, cooked (5 oz.) + potato baked (1 medium, 5.5oz)                           |
|                                           | <b>SNACK</b>     | Yogurt, low- fat (0-1.99%) (8 oz.) + 1 tbs linseed, grinded + apple, with its skin (1 small) +                                                              |
|                                           | <b>DINNER</b>    | Seasonal salad <sup>(2)</sup> + barley rusk (1 oz.) + feta, or any other medium- fat cheese (2 oz.)                                                         |

| R<br>E<br>D<br>M<br>E<br>A<br>T | MEALS            | MENU 1 TIME WEEKLY                                                                                                                                  |
|---------------------------------|------------------|-----------------------------------------------------------------------------------------------------------------------------------------------------|
|                                 | <b>BREAKFAST</b> | Fresh milk <sup>(1)</sup> 0-3.49% fat (1 cup)+ oat flakes or cereals(1 oz.)+ ½ banana (2 oz.)                                                       |
|                                 | <b>SNACK</b>     | Fresh orange juice (1 cup) + almonds, or any other type of nuts, fresh (0.3 oz.)                                                                    |
|                                 | <b>LUNCH</b>     | Seasonal salad <sup>(2)</sup> or vegetable soup + beef steak, without visible fat, or any other low- fat type of meat (5 oz.)+ barley rusks (2 oz.) |
|                                 | <b>SNACK</b>     | Figs, fresh (2 small, 2.5 oz.) + Yogurt, low- fat (0- 1.99%) (4 oz.)                                                                                |
|                                 | <b>DINNER</b>    | Lentils and tuna Salad: Seasonal salad <sup>(2)</sup> (e.g. carrot) + lentils, boiled (3.5oz.)+ tuna, conserved (2.5 oz.)                           |

| F<br>I<br>S<br>H | MEALS            | MENU 2 TIMES WEEKLY                                                                                                 |
|------------------|------------------|---------------------------------------------------------------------------------------------------------------------|
|                  | <b>BREAKFAST</b> | Yogurt, low- fat (2-3.49%) (8 oz.) + oat flakes (1 oz.) + apple, with its skin (1 small) + 1 tbs linseed, grinded   |
|                  | <b>SNACK</b>     | Tangerines (2 small)+ whole wheat rusks (1 oz.                                                                      |
|                  | <b>LUNCH</b>     | Seasonal salad <sup>(2)</sup> or vegetable soup + fish, grilled/cooked (6 oz.) + 1 potato, boiled (1 medium, 5 oz.) |
|                  | <b>SNACK</b>     | Cherries, fresh (3 oz.) + Yogurt, low- fat (0- 1.99%) (4 oz.)                                                       |
|                  | <b>DINNER</b>    | Seasonal salad <sup>(2)</sup> + potato, boiled (3 oz.) + 2 oz. feta cheese, or any other medium- fat cheese         |

| L<br>E<br>G<br>U<br>M<br>E<br>S | MEALS            | MENU 1 TIME WEEKLY                                                                                                                             |
|---------------------------------|------------------|------------------------------------------------------------------------------------------------------------------------------------------------|
|                                 | <b>BREAKFAST</b> | Fresh milk <sup>(1)</sup> 0- 1.99% fat (1 cup) + 1 sl. Whole wheat bread (1oz.) + ½ tbs tachini + ½ tsp honey                                  |
|                                 | <b>SNACK</b>     | Fresh orange juice (1 cup)                                                                                                                     |
|                                 | <b>LUNCH</b>     | Seasonal salad <sup>(2)</sup> + chickpeas, boiled (1 cup, 5.5 oz.) + 2 oz. feta cheese, or any other medium- fat cheese (e.g. chickpeas salad) |
|                                 | <b>SNACK</b>     | 1 banana (4 oz.) + Fresh milk <sup>(1)</sup> 0- 1.99% fat (1/2 cup) (π.χ. milkshake)                                                           |
|                                 | <b>DINNER</b>    | Seasonal salad <sup>(2)</sup> or vegetable soup + fish, grilled/cooked (4 oz.)                                                                 |

| S<br>T<br>A<br>R<br>C<br>H | MEALS            | MENU 1 TIME WEEKLY                                                                                                          |
|----------------------------|------------------|-----------------------------------------------------------------------------------------------------------------------------|
|                            | <b>BREAKFAST</b> | Yogurt, low- fat (2-3.49%) (8 oz.) + oat flakes (1 oz.) + apple, with its skin (1 small) + 1 tbs linseed, grinded+ cinnamon |
|                            | <b>SNACK</b>     | Fresh orange juice (1 cup)                                                                                                  |
|                            | <b>LUNCH</b>     | Seasonal salad <sup>(2)</sup> + spaghetti or rice, boiled (1 cup) + prawns, cooked (3 oz.)                                  |
|                            | <b>SNACK</b>     | 1 pear (3 oz.) + 0.5 low fat cheese                                                                                         |
| H                          | <b>DINNER</b>    | Seasonal salad <sup>(2)</sup> + 1 oz. grinded parmesan or feta cheese + chicken, without skin (4oz.)                        |
